# Supplementary material for: Au@ZnO hybrid nanostructures: correlation between morphology and optical response
Source: Royal Society of Chemistry journal article supplement (doi:10.1039/c5ra05834a), 2015-01-01
Supplement: c5ra05834a1.pdf [file c5ra05834a1.pdf]

## Electronic Supplementary Information

# **Au@ZnO hybrid nanostructures: correlation between morphology and optical response**

Ezequiel R. Encina, Manuel A. Pérez  
and Eduardo A. Coronado\*

*INFIQC-CONICET, Departamento de Fisicoquímica, Facultad de  
Ciencias Químicas, Universidad Nacional de Córdoba, Córdoba  
(5000) Argentina.*

Corresponding author: Eduardo A. Coronado

e-mail address: [coronado@fcq.unc.edu.ar](mailto:coronado@fcq.unc.edu.ar)

Tel: +54-351-535-3866 Fax: +54-351-433-4180

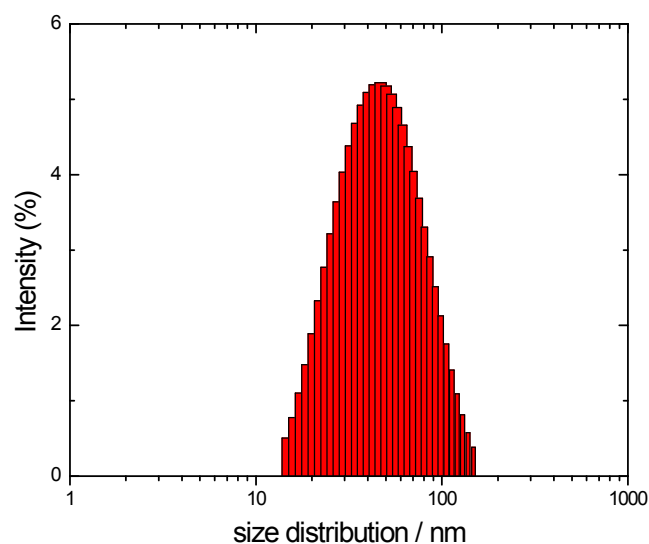

**Figure S1.** Intensity size distribution of unmodified Au NPs suspensions obtained by photo correlation spectroscopy.

#### **Estimation of the mean crystallite size**

The mean crystallite size of Au and ZnO materials was obtained by applying the Scherrer equation:

$$L = \frac{K \lambda}{FWHM \cos(\theta)},$$

where FWHM stands for the half width at half maximum of a certain diffraction peak in radians and L stands for the mean coherence length perpendicular to a given plane and. K stands for a dimensionless shape factor (the value 0.94 characteristic of spherical shape was employed in the current work),  $\lambda$  stands for the X-ray wavelength and  $\theta$  is the Bragg angle.
